# Supplementary material for: Blast resistance in Indian rice landraces: Genetic dissection by gene specific markers
Source: PLoS One. 2019 Jan 23;14(1):e0211061. doi: 10.1371/journal.pone.0211061 (PMC6343911; doi:10.1371/journal.pone.0211061)
Supplement: S2 Table — (XLSX) [file pone.0211061.s004.xlsx]

## Sheet: Sheet1
			Pib	Piz	Piz-t	Pik	Pik-p	Pikm	Pi54	Pi9	Pi2	Pita/Pita2	Pi5	Pit	Pit	Pid2	Pish	Pish	Pb1	Pi33	Pia	Pi1	Pi1	pi21	Pi56	Pi65	Pi36	Pi37	Pi37	Pi25	No. of gene	Disease score
S.N.	Accessions	Common name	Pb28	Z56592	Zt56591	K39512	K3957	k2167	Pikh	Pi9-i	Pi2-i	YL155/YL87	40N23R	tk59-1	tk59-2	dln2	RM6648	Rm5811	Rm26998	Rm72	Pia-STS	RM1233	RM224	pi21_79-3	CRG4-2	SNP_3	Rm5647	Rm302	Rm212	RM564
L3	AC-199	Dodgyab 2-2	1	1	1	1	1	1	1	0	0	0	0	1	1	1	0	0	1	0	1	0	1	0	0	1	0	0	0	0	13	4
L4	AC-231	Chinoot	1	1	1	1	1	1	1	0	0	1	0	1	1	1	0	0	1	0	1	0	0	0	0	0	0	0	0	0	12	6
L5	AC-261	Poonakar	1	1	1	1	1	1	1	0	0	1	0	1	1	1	0	0	0	0	1	0	0	0	0	1	1	0	0	0	13	6
L6	AC-274	Wadansamba	1	1	1	1	0	1	0	0	0	0	1	0	0	1	0	0	1	0	1	1	1	0	1	1	0	0	0	1	13	7
L7	AC-290	Mypali	1	1	1	1	1	1	1	0	0	1	1	1	1	1	0	0	0	0	1	0	0	0	1	0	1	0	0	0	14	5
L8	AC-295	Bangarutheega	1	1	0	1	1	1	1	0	0	1	0	1	1	1	0	0	1	0	1	1	1	0	0	0	0	0	0	0	12	5
L9	AC-296	Manasagaeam	1	1	1	1	1	1	1	0	0	1	1	1	1	1	0	0	1	0	1	1	0	0	1	0	1	0	0	0	16	6
L10	AC-301	Kartika amba	1	1	1	1	1	1	1	0	0	1	1	1	1	1	0	0	1	0	1	1	1	0	0	1	1	0	0	0	16	6
L11	AC-304	Peria kichili	1	1	1	1	1	1	1	0	0	1	0	1	1	1	0	0	1	0	1	0	0	0	1	0	1	0	0	0	14	6
L12	AC-305	Pormbalai	1	0	0	1	1	0	1	0	0	1	1	1	1	1	0	0	0	0	1	0	0	0	1	0	0	0	0	0	10	5
L13	AC-317	Pasudhandu	1	0	0	1	1	1	1	0	0	1	1	0	0	1	0	0	0	0	1	0	1	0	1	0	0	0	0	0	11	6
L14	AC-326	Rangoon samba	0	1	1	1	0	1	0	0	1	1	1	1	1	1	0	0	1	0	0	1	1	0	1	0	0	0	0	0	12	7
L15	AC-335	Pottiatragada	1	1	1	1	1	0	0	1	1	1	0	1	1	1	0	0	1	0	1	0	0	0	1	0	1	0	0	0	14	6
L16	AC- 355	Velluliari kayama	1	1	1	1	0	1	1	0	0	0	1	0	0	1	0	0	0	0	1	0	0	0	0	0	0	0	0	0	9	5
L17	AC-365	Kavanguri Poothala	0	1	1	1	1	1	1	1	0	1	0	1	1	1	0	0	1	0	0	0	0	0	0	1	1	0	0	0	13	6
L18	AC-366	Kavanguri Poothala	1	1	1	1	1	0	1	0	0	0	0	1	1	1	0	0	1	0	1	1	1	0	1	0	1	0	0	0	13	6
L19	AC-368	Erava pandy	1	1	1	1	1	1	1	1	0	0	0	1	1	1	0	0	1	0	1	1	1	0	0	1	1	0	0	0	15	7
L20	AC-373	Punsana No83	1	1	1	1	1	1	1	1	0	1	1	1	1	1	0	0	0	0	1	1	1	0	1	1	1	0	0	0	17	5
L21	AC-427	Kajal champa	1	1	1	1	1	1	0	1	1	1	1	1	1	1	0	0	0	0	1	0	0	0	0	0	1	0	0	0	14	8
L22	AC-431	Usa	1	1	1	1	1	1	1	0	1	1	0	1	1	1	0	0	1	0	1	1	1	0	1	0	1	0	0	0	16	5
L23	AC-436	DI 3	1	1	1	1	1	0	1	0	0	1	0	1	1	1	1	1	0	0	1	0	0	0	0	1	1	0	0	1	14	5
L24	AC-452	Mypali	1	1	1	1	1	1	1	0	1	1	1	1	1	1	0	0	1	1	1	0	1	0	1	0	1	0	0	0	18	4
L25	AC-473	CM 76	0	1	1	1	1	0	1	0	0	0	1	1	1	1	0	0	1	0	1	0	0	0	0	0	0	0	0	0	10	1
L26	AC-476	Basumati 370	1	1	1	1	1	1	1	0	0	1	0	1	1	1	0	0	1	0	1	0	0	0	1	0	1	0	0	0	14	5
L27	AC-39737	Champe	1	1	1	1	1	0	0	0	0	1	0	1	1	1	0	0	1	0	1	1	0	0	0	0	1	0	0	0	12	0
L28	AC-39738	Champei sali	0	1	1	1	1	0	0	0	0	1	0	1	1	1	0	0	1	0	1	1	1	0	0	0	1	0	0	0	11	1
L29	AC-39739	Chhota atte (S)	1	1	1	1	1	0	1	0	0	1	0	1	1	0	0	0	1	0	1	1	1	0	0	0	1	0	0	0	12	6
L30	AC-39741	Anadi	0	1	1	1	1	0	1	0	1	0	1	1	1	1	0	0	1	0	1	1	1	0	1	0	1	1	0	0	15	4
L31	AC-39742	Basmati (s)	1	1	0	1	1	0	0	0	0	0	1	1	1	1	0	0	1	0	1	1	0	0	1	1	1	0	0	0	13	5
L32	AC-39744	Thula atte	1	1	0	1	1	0	0	0	0	1	1	1	1	1	0	1	1	1	1	1	0	0	1	1	1	0	0	0	16	6
L33	AC-39746	Taichung	1	1	0	1	1	0	1	0	0	0	1	1	1	1	0	0	0	1	0	1	1	0	1	1	1	1	0	0	14	5
L34	AC-39747	Kanchu atte	1	1	1	1	1	1	1	0	1	1	1	1	1	1	0	0	1	0	1	1	1	1	1	0	1	0	0	0	18	5
L35	AC-39750	Baghey tulashi (s)	1	1	1	1	1	0	1	0	1	1	1	1	1	1	1	1	1	0	1	0	0	0	0	0	1	0	0	0	15	5
L36	AC-39751	Chirakhey	1	1	1	1	1	0	1	0	1	0	1	1	1	1	1	1	1	0	1	0	0	0	1	0	1	0	0	0	15	3
L37	AC-39752	Basmati(s)	0	1	1	1	1	1	1	0	0	1	0	1	1	1	0	0	1	0	1	1	1	0	0	1	1	0	0	1	15	7
L38	AC-39754	Chhota Atte	1	1	1	1	1	0	1	0	1	0	1	0	0	1	0	1	1	0	1	1	0	0	1	1	1	0	0	0	16	5
L39	AC-39756	Bada Atte	0	1	1	1	1	1	1	1	1	1	1	1	1	1	0	0	1	0	0	1	1	0	1	0	1	0	0	1	17	0
L40	AC-39757	Lamo	0	1	1	1	1	0	1	0	0	1	0	1	1	0	1	0	1	0	1	1	1	0	0	1	1	0	0	1	14	1
L41	AC-39759	Atte	1	1	1	1	1	0	1	0	1	1	1	1	1	1	1	1	1	0	1	1	1	0	1	1	1	0	0	0	18	5
L42	AC-39760	Pusa Basmati (s)	1	1	1	1	1	0	1	0	0	1	0	1	1	1	0	0	0	0	0	0	1	0	0	1	0	0	0	0	11	6
L43	AC-39761	khimti	1	1	1	1	1	0	0	0	0	1	0	1	1	1	0	0	1	0	1	1	1	0	0	0	0	0	0	1	12	1
L44	AC-39762	Jhapaca	0	1	1	1	1	0	1	0	1	0	1	1	1	1	0	0	1	0	0	1	1	0	1	0	1	0	0	1	14	1
L45	AC-39769	Atte	0	1	1	1	1	0	1	0	1	1	1	1	1	1	1	1	1	0	1	0	1	0	1	0	1	0	0	0	16	5
L46	AC-39770	Tapre	1	1	1	1	1	1	1	0	1	1	0	1	1	1	0	0	1	0	1	1	1	0	1	1	1	0	0	0	17	6
L47	AC-39776	Thima	1	1	1	1	1	0	1	0	0	1	1	0	0	1	1	0	1	0	1	1	0	0	1	0	1	0	0	0	15	4
L48	AC-39777	Kal Chanti(s)	0	1	1	1	1	0	1	0	1	0	1	1	1	1	0	0	1	0	1	1	1	0	1	1	1	0	0	0	15	5
L49	AC-39787	Kamla	0	1	1	1	1	1	1	0	0	1	0	1	1	1	1	0	0	0	1	1	1	0	0	1	1	1	0	0	15	6
L50	AC-39788	Joda	1	1	1	1	1	1	0	0	0	1	0	0	0	1	0	0	0	0	1	0	0	0	0	1	1	1	0	0	12	6
L51	AC-39789	Karjat-3	0	1	1	1	1	1	1	0	0	0	0	0	0	1	0	0	0	0	1	0	1	0	0	0	0	0	0	0	9	5
L52	AC-39790	Kankuri	0	1	1	1	1	0	0	0	0	0	0	0	0	1	0	0	0	0	1	0	0	0	0	1	1	1	1	0	9	4
L53	AC-39791	Bella	1	1	1	1	1	1	1	0	0	1	1	0	0	1	0	0	0	0	1	0	0	0	1	0	0	0	0	0	12	8
L54	AC-39794	Karjat-2	0	1	1	1	1	0	1	0	0	0	0	0	0	1	0	0	0	0	1	0	0	0	0	0	0	0	0	0	7	1
L55	AC-39797	Sarathi	0	1	1	1	1	0	1	0	0	0	0	0	0	1	0	0	1	0	1	1	1	0	0	1	0	0	0	0	10	6
L56	AC-39798	Sonaphal	0	1	1	1	1	0	0	0	0	1	0	0	0	1	0	0	0	0	1	0	0	0	0	1	1	1	1	0	10	6
L57	AC-39799	Nakeswar	0	1	1	1	1	1	1	0	0	1	1	0	0	1	0	0	0	0	1	1	1	0	1	0	1	0	1	0	14	8
L58	AC-39802	RP	1	1	1	1	1	0	0	0	0	1	0	0	0	1	0	0	0	0	1	0	0	0	1	0	1	1	1	0	11	1
L59	AC-39806	Basumati	0	1	1	1	1	1	1	0	0	0	0	0	0	1	0	0	0	0	1	1	1	0	1	1	1	1	1	0	13	4
L60	AC-39807	Akola	0	1	1	1	1	0	0	0	0	0	0	0	0	1	0	0	0	0	1	0	0	0	0	1	1	1	1	0	9	1
L61	AC-39809	Karjat-14	0	1	1	1	1	0	0	1	0	1	0	0	0	1	0	0	0	0	1	0	0	0	0	1	1	1	1	0	11	5
L62	AC-39812	Kolpi	0	1	1	1	1	0	0	0	0	0	0	0	0	1	0	0	0	0	0	0	0	0	0	1	1	1	1	0	8	4
L63	AC-39813	Rampal	0	1	1	1	1	0	0	0	0	0	0	0	0	1	0	0	0	0	1	0	1	0	0	1	1	0	0	0	9	6
L64	AC-39814	Matri	0	1	0	1	1	0	0	0	0	0	0	1	1	1	0	0	0	0	1	0	1	0	0	1	1	0	0	0	9	7
L65	AC-39816	Gujuri Samba	0	1	1	1	1	1	1	0	0	1	1	1	1	1	0	0	0	0	0	1	1	0	1	0	0	0	0	0	12	7
L66	AC-39819	Karjat-8	1	1	1	1	1	1	1	0	0	1	0	0	0	1	0	0	0	0	0	0	1	0	0	1	0	1	1	0	12	6
L67	AC-39820	Khudia	0	1	1	1	1	0	1	1	0	1	0	0	0	1	0	0	0	0	1	0	1	0	0	1	1	1	1	0	13	6
L68	AC-39823	Saurav	0	1	1	1	1	1	1	0	0	0	0	0	0	1	0	0	1	0	0	1	1	0	0	1	0	0	0	0	10	5
L69	AC-39824	Jyoti	0	1	1	1	1	1	1	0	0	0	0	0	0	1	0	0	0	0	0	1	1	0	0	1	1	0	0	0	10	1
L70	AC-39825	Walle	0	1	1	1	0	1	1	0	0	0	1	0	0	1	0	0	0	0	1	1	0	0	0	0	0	0	0	0	9	5
L71	AC-39826	Mahsura	0	1	1	1	1	0	1	0	0	0	1	0	0	1	0	0	0	0	1	1	1	0	0	1	0	0	0	0	10	6
L72	AC-39827	Gouti	0	1	1	1	1	1	1	0	0	1	1	0	0	1	0	0	0	0	1	1	1	0	0	0	1	0	0	0	12	5
L73	AC-39828	Bombay Mahasuri	0	1	1	1	1	1	1	1	0	1	1	0	0	1	0	0	1	0	0	0	0	0	1	1	1	0	0	0	14	7
L74	AC-39829	Chitalgam	0	1	1	1	1	1	1	1	0	1	1	0	0	1	0	0	0	0	1	0	0	0	1	1	1	0	0	0	14	5
L75	AC-39830	Suruti	0	1	0	1	1	0	1	0	0	0	1	0	0	1	0	0	0	0	0	0	0	0	0	0	1	0	0	0	7	6
L76	AC-39833	Jaya	0	1	0	1	1	0	1	0	0	0	0	0	0	1	0	0	0	0	0	0	0	0	0	0	0	0	0	0	5	1
L77	AC-39834	Saat Akra	0	1	0	1	1	1	1	0	0	1	0	0	0	1	0	0	1	0	1	0	1	0	0	1	1	0	0	1	13	6
L78	AC-39839	Indrayani	0	1	0	1	0	1	1	0	0	0	1	0	0	1	0	0	0	0	0	0	1	0	0	0	1	1	1	0	9	6
L79	AC-39842	Paijam	0	1	1	1	1	1	1	1	0	0	0	0	0	1	0	0	1	0	0	0	0	0	1	0	0	0	0	0	10	5
L80	AC-39844	Takur bug	1	0	0	1	1	1	1	0	0	1	0	0	0	1	0	0	1	0	1	1	0	0	0	1	0	0	0	1	12	7
L81	AC-39845	Bini (s)	0	1	1	1	1	1	1	0	0	1	0	1	1	1	0	0	0	0	1	0	1	0	0	1	1	0	0	0	13	5
L82	AC-39846	Ranjit	0	1	1	1	1	1	1	0	0	0	1	1	1	1	0	0	0	0	1	1	0	0	1	0	1	0	0	1	14	5
L83	AC-39847	Kali khasa (s)	0	1	1	1	1	1	1	0	0	0	1	1	1	1	0	0	0	0	1	0	1	0	1	1	1	0	0	0	14	6
L84	AC-39850	Ghigaj	0	1	0	1	1	1	1	0	0	0	1	1	1	1	1	1	1	1	1	0	1	0	1	1	0	0	0	0	15	6
L85	AC-39851	Kali kasa (s)	0	1	1	1	1	1	1	1	0	1	0	1	1	1	0	0	1	0	1	1	1	0	1	1	0	0	0	1	16	5
L86	AC-39852	Garu	0	1	1	1	1	1	1	0	0	0	1	0	0	1	0	0	1	0	1	0	1	0	1	1	1	0	0	1	15	5
L87	AC-39853	Karn rung	0	1	1	1	1	1	1	0	0	0	1	1	1	1	0	0	0	0	1	0	1	0	1	1	1	0	0	1	15	5
L88	AC-39854	Kain chali	0	1	1	1	1	1	1	0	0	0	0	0	0	1	0	0	1	1	1	0	1	0	0	0	1	0	0	1	13	4
L89	AC-39855	Kampai	0	1	1	1	1	1	0	0	0	0	1	1	1	1	1	1	1	1	1	0	0	0	0	0	1	0	0	0	13	5
L90	AC-39857	kapro	0	1	0	1	1	1	1	0	0	0	1	1	1	1	1	1	1	1	1	0	0	1	1	0	0	0	0	0	14	5
L91	AC-39859	Zilong	0	1	1	1	1	1	1	0	0	0	1	1	1	1	0	0	0	0	1	0	1	0	0	1	1	0	0	1	14	6
L92	AC-39860	Paijam(chhota)	0	1	1	1	1	0	1	0	0	0	1	0	0	1	0	0	1	0	1	1	0	0	1	0	0	1	1	0	12	5
L93	AC-39861	Kauli	0	1	0	1	1	1	1	0	0	1	1	0	0	1	0	0	1	0	0	1	0	0	1	1	0	0	0	0	12	6
L94	AC-39862	Admachikam	0	1	1	1	1	1	1	0	0	0	1	1	1	1	0	0	1	0	1	0	1	0	0	1	1	0	0	1	15	6
L95	AC-39863	Beti	0	1	0	1	1	1	0	0	0	0	1	1	1	1	1	1	1	1	1	0	0	0	1	1	0	0	0	0	13	6
L96	AC-39864	Garomalati	0	1	1	1	1	1	1	0	0	0	1	1	1	1	0	0	1	0	1	0	0	0	1	0	0	0	0	1	13	1
L97	AC-39866	Kalabiron	0	1	1	1	1	0	1	0	0	1	0	1	1	1	0	0	1	0	1	0	0	0	0	1	1	0	0	0	12	6
L98	AC-39867	Maichakca	0	1	1	1	1	1	1	1	0	1	1	1	1	1	0	0	0	0	1	1	1	0	1	0	0	0	0	1	15	7
L99	AC-39868	Mamichapa	0	1	0	1	1	1	1	0	0	1	0	1	1	1	0	0	1	0	1	1	1	0	0	0	1	0	0	0	12	7
L100	AC-39869	Gabbori	0	1	1	1	1	1	1	0	0	0	1	1	1	1	0	0	1	0	1	0	0	0	1	0	1	0	0	1	14	4
L101	AC-39870	Biran	0	1	1	1	1	1	1	1	0	1	1	1	1	1	0	0	1	1	1	1	1	0	1	1	1	0	0	1	19	5
L102	AC-39871	Khasa	0	1	1	1	1	0	0	0	0	0	0	1	1	1	0	0	0	0	0	0	0	0	0	1	1	1	1	1	10	0
L103	AC-39872	Bini(s)	0	1	1	1	1	1	1	1	0	1	1	1	1	1	0	0	0	0	1	1	1	0	1	1	0	0	0	1	16	5
L104	AC-39874	Biron	0	1	1	1	1	1	0	0	0	1	0	1	1	1	0	0	1	0	1	0	0	0	0	1	0	0	0	1	12	7
L105	AC-39875	Upahar	0	1	1	1	1	1	1	0	0	0	1	1	1	1	0	0	0	0	1	0	1	0	1	1	1	0	0	1	15	1
L106	AC-39876	Bini	0	1	1	1	1	1	1	0	0	1	1	1	1	1	0	0	1	0	1	0	0	0	1	0	0	0	0	1	14	6
L107	AC-39877	Nagra	0	1	1	1	1	0	1	0	0	1	0	1	1	1	0	0	1	0	1	0	1	0	0	0	1	0	0	0	12	6
L108	AC-39878	Khasa(Black)	0	1	1	1	1	1	1	0	0	0	1	1	1	1	1	1	1	1	1	0	0	0	0	0	0	0	0	0	13	5
L109	AC-39879	Birun	0	1	1	1	1	1	1	0	0	0	1	1	1	1	0	0	0	1	1	0	1	0	1	1	0	1	1	1	16	1
L110	AC-39880	Kartik Sal	0	1	1	1	1	0	0	0	0	0	0	1	1	1	0	0	1	0	1	0	1	0	1	0	1	0	0	1	12	4
L111	AC-39881	Khasa(White)	0	1	1	1	1	1	1	1	0	1	1	0	0	1	0	0	0	0	1	0	1	0	1	1	0	0	0	1	15	5
L112	AC-39882	Benni	0	1	1	1	1	0	1	0	0	0	1	0	0	1	0	0	0	0	1	0	1	0	1	0	1	1	0	0	12	5
L113	AC-39883	Khasa(Black)	0	1	1	1	1	0	1	0	0	0	1	1	1	1	1	1	1	1	1	0	0	0	1	1	0	0	0	0	14	5
L114	AC-39885	Red Binni	0	1	1	1	1	1	1	1	0	1	1	1	1	1	0	0	1	0	1	0	0	0	1	1	1	0	0	0	16	7
L115	AC-39886	Black Binni	0	1	1	1	1	1	1	0	0	1	1	0	0	1	0	0	1	0	1	0	1	0	1	1	0	0	0	0	14	6
L116	AC-39888	Maime Kasana	0	1	1	1	1	1	1	1	0	1	1	0	0	1	0	0	0	0	1	0	0	0	1	1	0	0	0	0	13	6
L117	AC-39889	Binni Red	0	1	1	1	1	1	1	1	0	1	1	0	0	1	0	0	0	0	1	1	1	0	1	1	1	0	0	0	15	5
L118	AC-39890	Hari narayan	0	1	1	1	1	0	1	0	1	1	1	0	0	1	1	1	1	1	1	0	1	0	1	1	0	0	0	1	17	6
L119	AC-39891	Gujuri	0	1	1	1	1	1	0	0	0	1	1	0	0	1	0	0	1	0	1	0	0	0	1	0	0	0	0	0	11	7
L120	AC-39892	Gujarat-70	0	1	1	1	1	1	1	0	0	0	0	1	1	1	0	0	0	1	0	0	0	0	0	1	1	0	0	0	11	5
L121	AC-39893	Gujuri	0	1	1	1	1	1	1	0	0	1	1	1	1	1	1	0	1	0	0	0	0	1	1	0	0	0	0	1	15	7
L122	AC-39894	Sandal Basmati (s)	0	1	1	1	1	1	0	0	0	1	0	0	0	1	0	0	0	1	1	0	0	0	0	1	1	1	1	1	13	5
L123	AC-39895	Sonam (s)	0	1	0	1	1	1	1	0	0	1	0	0	0	1	0	0	1	0	1	0	1	0	0	1	1	0	0	1	13	5
L124	AC-39896	Jaad	0	1	0	1	1	0	1	0	0	0	1	1	1	1	1	0	0	0	0	0	0	0	1	1	0	1	1	0	11	5
L125	AC-39898	Kamod Krishna (s)	0	1	0	1	1	1	0	0	0	0	1	0	0	1	1	0	1	0	1	1	0	0	1	1	0	1	0	0	13	5
L126	AC-39903	Rachki	0	1	1	1	1	1	0	0	0	1	0	0	0	1	0	0	0	0	0	1	1	0	0	1	0	0	0	1	10	7
L127	AC-39904	Lachki	0	1	1	1	1	1	1	1	0	1	0	0	0	1	0	0	0	0	0	0	1	0	0	1	0	0	0	1	12	6
L128	AC-39906	Gujrati Mhsuri	0	1	1	1	1	0	0	0	0	0	1	0	0	1	0	0	0	0	1	1	0	0	1	0	0	0	0	0	9	4
L129	AC-39908	Gujarat-70	0	1	1	1	1	0	0	0	0	0	0	0	0	1	0	0	0	0	0	0	0	0	0	1	1	0	0	1	8	6
L130	AC-39910	Saket	0	1	1	1	1	1	0	0	0	1	0	0	0	1	0	0	0	0	0	0	1	0	0	1	1	1	1	1	12	5
L131	AC-39911	Central Basmati (s)	0	1	0	1	1	1	0	0	0	1	0	0	0	1	0	0	0	0	1	0	0	0	0	1	1	1	1	1	11	5
L132	AC-39912	Tata	0	1	1	1	1	1	1	0	0	0	0	1	1	1	1	0	0	0	1	0	1	0	0	1	0	0	0	0	12	5
L133	AC-39914	Poigra	0	1	1	1	1	1	1	0	0	0	0	1	1	1	0	0	0	0	1	1	1	0	0	1	0	1	1	1	13	5
L134	AC-39915	Moti	0	1	1	1	1	1	1	0	0	0	0	0	0	1	0	0	1	0	0	1	1	0	0	1	0	0	0	0	10	5
L135	AC-39916	Sonam (s)	0	1	0	1	1	1	1	0	0	0	0	0	0	1	0	0	0	0	1	1	1	0	0	1	1	0	0	1	11	6
L136	AC-39919	Gujarat-70	0	1	1	1	1	1	0	0	0	0	0	0	0	1	0	0	0	0	0	0	0	0	0	0	1	0	0	1	8	5
L137	AC-39921	Gujrat 70-1	0	1	1	1	1	1	0	0	0	0	0	0	0	1	0	0	0	0	0	1	1	0	0	0	1	0	0	1	9	8
L138	AC-39922	Jaya Gujari	0	1	1	1	1	0	0	0	0	0	0	1	1	1	0	0	0	0	0	0	0	0	0	0	0	1	1	0	7	1
L139	AC-39924	Jaya	0	1	1	1	1	0	0	0	0	0	0	1	1	1	0	0	0	0	0	1	1	0	0	0	1	0	0	0	8	8
L140	AC-39926	Gujarat-4	0	1	1	1	1	0	0	0	1	0	0	0	0	1	0	0	0	0	1	0	1	0	0	0	1	0	0	0	9	9
L141	AC-39927	Gujarat-3	0	1	1	1	1	0	1	1	1	0	1	1	1	1	0	0	1	0	1	0	0	0	1	0	0	1	1	0	14	6
L142	AC-39929	Kada	0	1	0	1	1	1	1	0	0	0	1	1	1	1	1	0	1	0	1	0	0	0	1	1	0	0	0	0	13	5
L143	AC-39930	Karchat	0	1	1	1	1	1	1	0	0	0	0	0	0	1	0	0	0	0	1	0	0	0	0	1	0	1	1	0	10	6
L144	AC-39931	Gujarat-11	0	1	1	1	1	1	0	1	0	0	0	1	1	1	0	0	0	0	0	0	1	0	0	1	0	0	0	1	11	8
L145	AC-39932	Dangi	0	1	1	1	1	0	1	0	0	1	1	1	1	1	0	0	0	0	0	1	1	0	0	0	1	0	0	0	11	5
L146	AC-39938	Akada	0	1	1	1	1	1	1	0	0	1	0	1	1	1	0	0	0	0	1	1	1	0	1	0	1	0	0	1	14	6
L147	AC-39939	Mahsuri-1	1	1	1	1	1	0	1	0	0	1	1	1	1	1	0	0	0	0	1	0	0	0	1	0	0	0	0	0	12	5
L148	AC-39943	Bodthadia(s)	0	1	1	1	1	1	0	0	0	1	1	1	1	1	0	0	0	0	1	1	1	1	0	0	1	1	1	0	14	6
L149	AC-39945	Basmati (s)	0	1	1	1	1	1	1	0	0	1	1	1	1	1	0	0	0	0	1	1	1	1	0	0	1	1	1	0	15	7
L150	AC-39952	Ghode	0	1	1	1	1	0	0	1	0	1	0	1	1	1	0	0	1	0	1	1	1	0	0	1	1	0	0	0	13	5
L151	AC-39353	Ambamohar (s)	0	1	1	1	1	1	1	0	0	1	1	0	0	1	0	0	1	0	1	1	1	0	0	0	1	0	0	0	13	5
L152	AC-39954	Kolam	0	1	1	1	1	0	1	0	0	1	0	1	1	1	0	0	1	0	0	0	0	0	0	1	0	0	0	0	10	6
L153	AC-39956	Jeeram	0	1	0	1	1	0	1	0	0	0	1	1	1	1	0	0	1	0	1	0	0	1	0	1	1	1	0	0	13	2
L154	AC-39957	Dabol	0	1	1	1	1	0	1	0	1	0	1	1	1	1	0	0	0	0	1	0	0	0	0	0	0	1	0	1	12	7
L155	AC-39958	Moti Sathi	0	1	1	1	1	1	1	1	0	1	1	1	1	1	0	0	0	0	1	0	0	1	0	1	1	0	0	0	15	5
L156	AC-39959	Gorakhnath-509	0	1	1	1	1	1	1	0	0	0	0	1	1	1	0	0	1	0	0	0	0	0	0	1	0	0	0	0	10	6
L157	AC-39960	Dadri Kalam (s)	0	1	1	1	1	1	0	0	0	0	1	0	0	1	0	0	1	0	1	0	0	0	1	1	1	0	0	0	12	3
L158	AC-39961	GR-101 (s)	0	1	1	1	1	0	0	0	0	1	1	1	1	1	0	0	0	0	0	0	0	0	0	0	0	1	0	0	9	5
L159	AC-39962	GR-102	0	1	1	1	1	0	1	1	0	0	0	1	1	1	0	0	0	0	0	0	0	0	0	1	1	1	0	1	12	7
L160	AC-39963	GR-103	0	1	1	1	1	0	1	0	0	1	0	1	1	1	0	0	0	0	0	0	0	0	0	1	1	0	0	1	11	5
L161	AC-39964	Narmada	0	1	1	1	1	0	0	0	0	1	0	1	1	1	0	0	0	0	0	0	0	0	0	1	0	0	0	1	9	5
L162	AC-39966	Dangir (s)	1	1	1	1	1	0	0	0	0	1	0	0	0	1	0	0	0	0	1	0	0	0	0	1	1	1	0	0	11	1
L163	AC-39967	Kulam	1	1	1	1	1	0	1	0	0	1	1	0	0	1	0	0	0	0	1	0	0	1	0	0	1	0	0	0	12	4
	Total no. of gene		43	158	137	161	156	97	118	25	20	87	83	97	97	159	20	14	79	15	123	61	82	8	72	89	99	34	24	47
	Gene frequency		26.7081	98.1366	85.0932	100	96.8944	60.2484	73.2919	15.528	12.4224	54.0373	51.5528	60.2484	60.2484	98.7578	12.4224	8.69565	49.0683	9.31677	76.3975	37.8882	50.9317	4.96894	44.7205	55.2795	61.4907	21.118	14.9068	29.1925
